# Supplementary material for: Fatty Acid Composition, Phospholipid Molecules, and Bioactivities of Lipids of the Mud Crab Scylla paramamosain
Source: Hindawi journal article supplement (doi:10.1155/2020/8651453), 2020-03-19
Supplement: f1 [file 8651453.f1.zip]

Archive with 7 entries (7 files):
- 8651453.f1/Figure 1S_JCHEM_3017958.docx
- 8651453.f1/Figure 2S_JCHEM_3017959.docx
- 8651453.f1/Figure 3S_JCHEM_3017960.docx
- 8651453.f1/Figure 4S_JCHEM_3017961.docx
- 8651453.f1/Figure 5S_JCHEM_3017962.docx
- 8651453.f1/Figure 6S_JCHEM_3017963.docx
- 8651453.f1/Figure 7S_JCHEM_3017964.docx
