# Supplementary material for: Fatty Acid Composition, Phospholipid Molecules, and Bioactivities of Lipids of the Mud Crab Scylla paramamosain
Source: Hindawi journal article supplement (doi:10.1155/2020/8651453), 2020-03-19
Supplement: f1 [file 8651453.f1.zip › 8651453.f1/Figure 1S_JCHEM_3017958.docx]

[M] +

[M-C20H28O]-

[C19H29COO] -

[M] -

[C19H29]-

[C20H27O]-

**(b)**

**(a)**

**(d)**

**(c)**

**Figure 1S**. HPLC-HRMS and fragmentations of alkenyl acyl PE 18:0p/20:5 (C43H76NO7P)

1. HPLC-HRMS Chromatogram of C43H76NO7P
2. Negative mass spectrometry (MS-) of C43H76NO7P
3. Possitive mass spectrometry (MS+) of C43H76NO7P
4. Negative mass spectrometry (MS2-) of signal at m/z 748.5128
