# Supplementary material for: Fatty Acid Composition, Phospholipid Molecules, and Bioactivities of Lipids of the Mud Crab Scylla paramamosain
Source: Hindawi journal article supplement (doi:10.1155/2020/8651453), 2020-03-19
Supplement: f1 [file 8651453.f1.zip › 8651453.f1/Figure 2S_JCHEM_3017959.docx]

[M]+

**(c)**

**(a)**

**(b)**

**(d)**

[M]-

[C21H31COO]-

[C21H31]-

[C15H31COO]-

[M-C22H30O]-

[C17H33COO]-

[C19H27COO]-

**(d)**

Figure 2S. HPLC-HRMS and fragmentations of diacyl PE 16:0/22:6 (C43H74NO8P)

1. HPLC-HRMS Chromatogram of C43H74NO8P
2. Negative mass spectrometry (MS-) of C43H74NO8P
3. Possitive mass spectrometry (MS+) of C43H74NO8P

Negative mass spectrometry (MS2-) of signal at m/z 762.4949
