# Supplementary material for: Fatty Acid Composition, Phospholipid Molecules, and Bioactivities of Lipids of the Mud Crab Scylla paramamosain
Source: Hindawi journal article supplement (doi:10.1155/2020/8651453), 2020-03-19
Supplement: f1 [file 8651453.f1.zip › 8651453.f1/Figure 3S_JCHEM_3017960.docx]

[M]-

**(b)**

**(a)**

[C19H29COO]-

[C19H29]-

[C20H27O]-

**(c)**

**Figure 3S.** HPLC-HRMS and fragmentations of LPE 20:4 (C25H42NO7P)

1. HPLC-HRMS Chromatogram of C25H42NO7P
2. Negative mass spectrometry of C25H42NO7P
3. Negative mass spectrometry of signal at m/z 498.2585
