# Supplementary material for: Fatty Acid Composition, Phospholipid Molecules, and Bioactivities of Lipids of the Mud Crab Scylla paramamosain
Source: Hindawi journal article supplement (doi:10.1155/2020/8651453), 2020-03-19
Supplement: f1 [file 8651453.f1.zip › 8651453.f1/Figure 4S_JCHEM_3017961.docx]

[C17H35COO]-

[C9H14O9P]-

[M-C19H30COO]-

[M]-

281.2461

**(a)**

**(b)**

**(c)**

**Figure 4S.** HPLC-HRMS and fragmentations of PI 18:0/20:5 (C47H81O13P)

1. HPLC-HRMS Chromatogram of C47H81O13P
2. Negative mass spectrometry (MS-)of C47H81O13P
3. Negative mass spectrometry (MS2-)of signal at m/z 883.5236
