# Supplementary material for: Fatty Acid Composition, Phospholipid Molecules, and Bioactivities of Lipids of the Mud Crab Scylla paramamosain
Source: Hindawi journal article supplement (doi:10.1155/2020/8651453), 2020-03-19
Supplement: f1 [file 8651453.f1.zip › 8651453.f1/Figure 5S_JCHEM_3017962.docx]

[M]-

[C19H29COO]-

[M-C3H5NO2-C19H29COO]-

[C20H28O]-

[C19H29]-

[M-C3H5NO2-C20H29O]-

**(a)**

**(c)**

**(b)**

**Figure 5S.** HPLC-HRMS (a) and fragmentations of PS 18:0/20:5 (C44H76NO10P)

1. HPLC-HRMS Chromatogram of C44H76NO10P
2. Negative mass spectrometry (MS-) of C44H76NO10P

Negative mass spectrometry (MS2-)of signal at m/z 808.4996
