# Supplementary material for: Fatty Acid Composition, Phospholipid Molecules, and Bioactivities of Lipids of the Mud Crab Scylla paramamosain
Source: Hindawi journal article supplement (doi:10.1155/2020/8651453), 2020-03-19
Supplement: f1 [file 8651453.f1.zip › 8651453.f1/Figure 6S_JCHEM_3017963.docx]

[M]+

[M-CH3]-

[M+HCOO]-

[C17H33COO]-

[C15H31COO]-

**(a)**

**(b)**

**(c)**

**(d)**

**Figure 6S.** HPLC-HRMS and fragmentations of PC 16:0/18:1 (C42H82NO8P)

1. HPLC-HRMS Chromatogram of C42H82NO8P
2. Possitive mass spectrometry (MS+) of C42H82NO8P
3. Negative mass spectrometry (MS-)of C42H82NO8P
4. Negative mass spectrometry (MS2-) of signal at m/z 744.5499
