# Supplementary material for: Fatty Acid Composition, Phospholipid Molecules, and Bioactivities of Lipids of the Mud Crab Scylla paramamosain
Source: Hindawi journal article supplement (doi:10.1155/2020/8651453), 2020-03-19
Supplement: f1 [file 8651453.f1.zip › 8651453.f1/Figure 7S_JCHEM_3017964.docx]

[C19H29COO]-

[C19H29]-

[M]-

[C20H27O]-

**(a)**

**(b)**

**(c)**

**Figure 7S.** HPLC-HRMS and fragmentations of LPC /20:5 (C28H48NO7P)

1. HPLC-HRMS Chromatogram of C28H48NO7P
2. Negative mass spectrometry (MS-)of C28H48NO7P

Negative mass spectrometry (MS2-)of signal at m/z 526.2520
